# Supplementary material for: Crystal chemistry and luminescence properties of red-emitting CsGd1−xEux(MoO4)2 solid-solution phosphors
Source: Royal Society of Chemistry journal article supplement (doi:10.1039/c4dt00339j), 2014-01-01
Supplement: c4dt00339j1.pdf [file c4dt00339j1.pdf]

## Supporting Information

### **Crystal Chemistry and Luminescent Properties of Red-Emitting CsGd<sub>1-x</sub>Eu<sub>x</sub>(MoO<sub>4</sub>)<sub>2</sub> Solid-Solution Phosphors**

Pinglu Shi<sup>1</sup>, Zhiguo Xia<sup>1,2\*</sup>, Maxim S. Molokeev<sup>3</sup>, Victor V. Atuchin<sup>4,5, 6</sup>

<sup>1</sup>*School of Materials Sciences and Technology, China University of Geosciences, Beijing 100083, China*

<sup>2</sup>*School of Materials Sciences and Engineering, University of Science and Technology Beijing, Beijing 100083, China*

<sup>3</sup>*Laboratory of Crystal Physics, Institute of Physics, SB RAS, Krasnoyarsk 660036, Russia*

<sup>4</sup>*Laboratory of Optical materials and Structures, Institute of Semiconductor Physics, SB RAS, Novosibirsk 630090, Russia*

<sup>5</sup>*Functional Electronics Laboratory, Tomsk State University, Tomsk 634050, Russia*

<sup>6</sup>*Laboratory of Semiconductor and Dielectric Materials, Novosibirsk State University, Novosibirsk 630090, Russia*

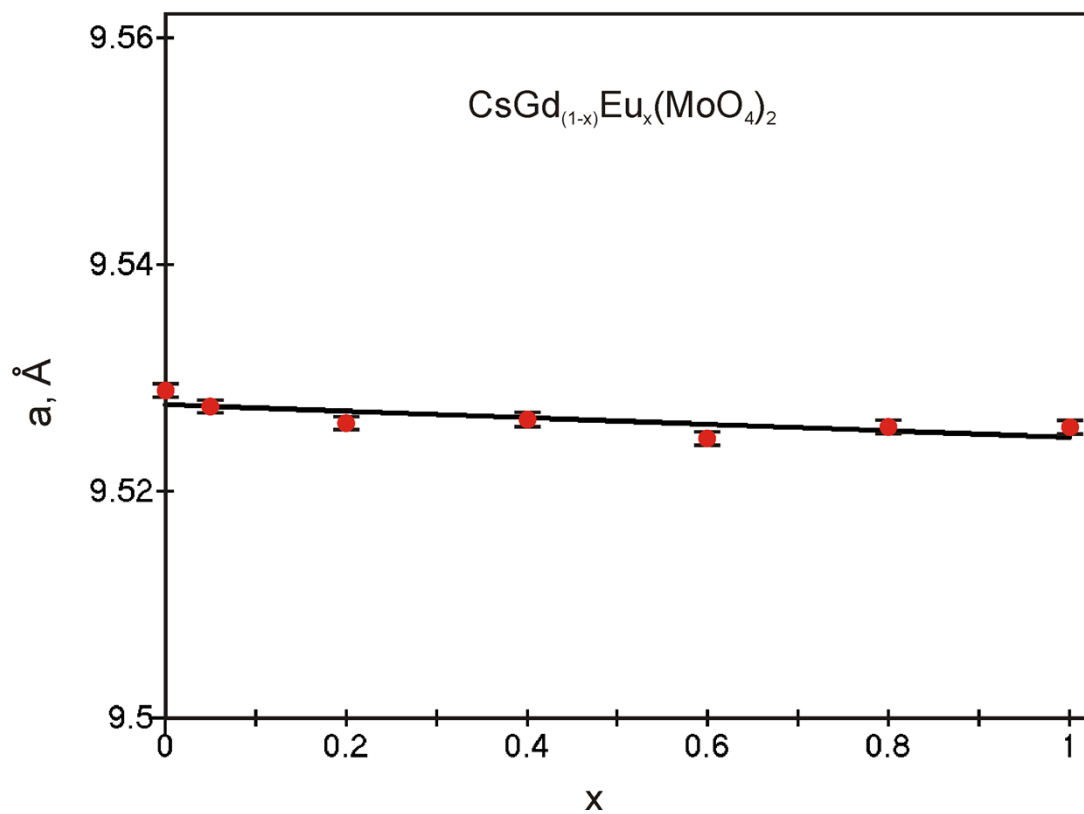

Fig. 1S. Dependence of unit cell parameter  $a$  on  $x$  in solid solutions  $\text{CsGd}_{1-x}\text{Eu}_x(\text{MoO}_4)_2$ .

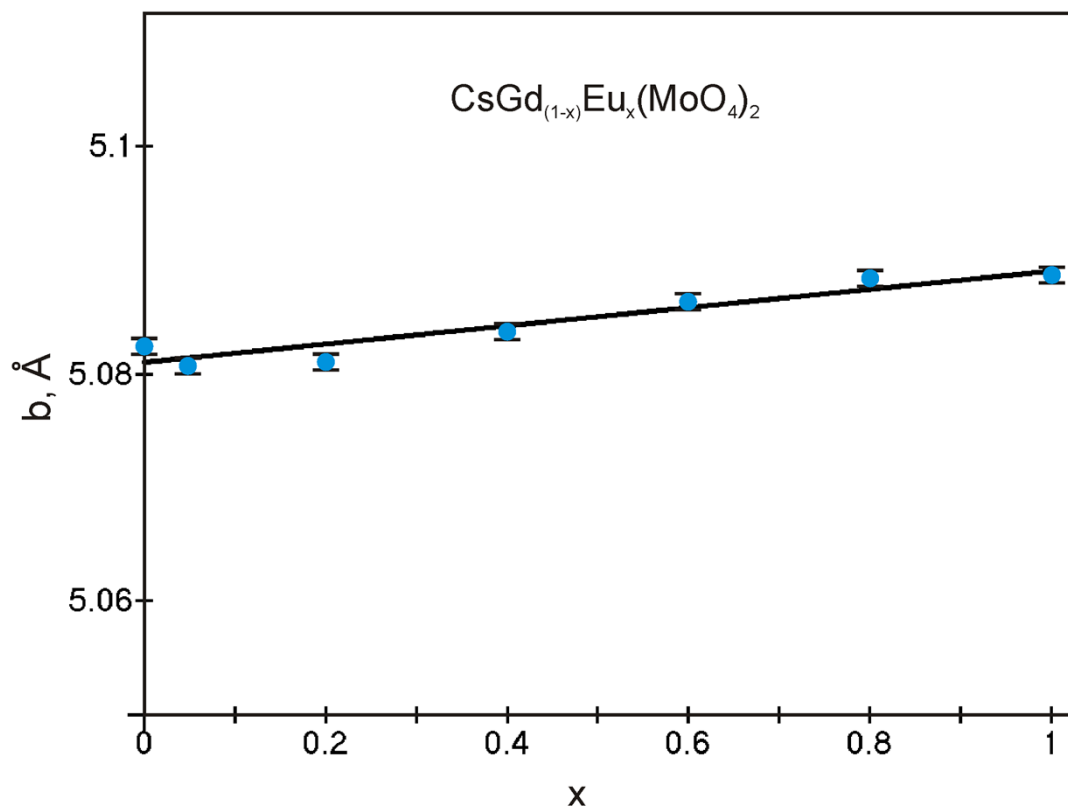

Fig. 2S. Dependence of unit cell parameter  $b$  on  $x$  in solid solutions  $\text{CsGd}_{1-x}\text{Eu}_x(\text{MoO}_4)_2$ .

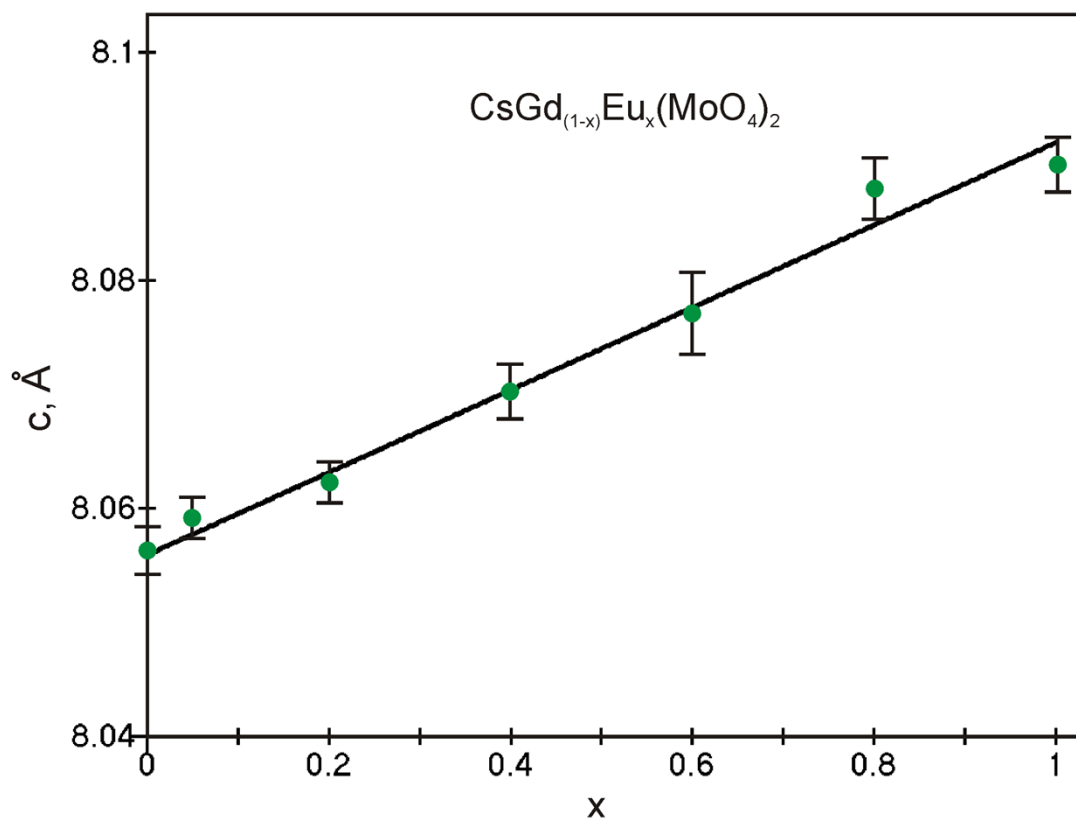

Fig. 3S. Dependence of unit cell parameter  $c$  on  $x$  in solid solutions  $\text{CsGd}_{1-x}\text{Eu}_x(\text{MoO}_4)_2$ .

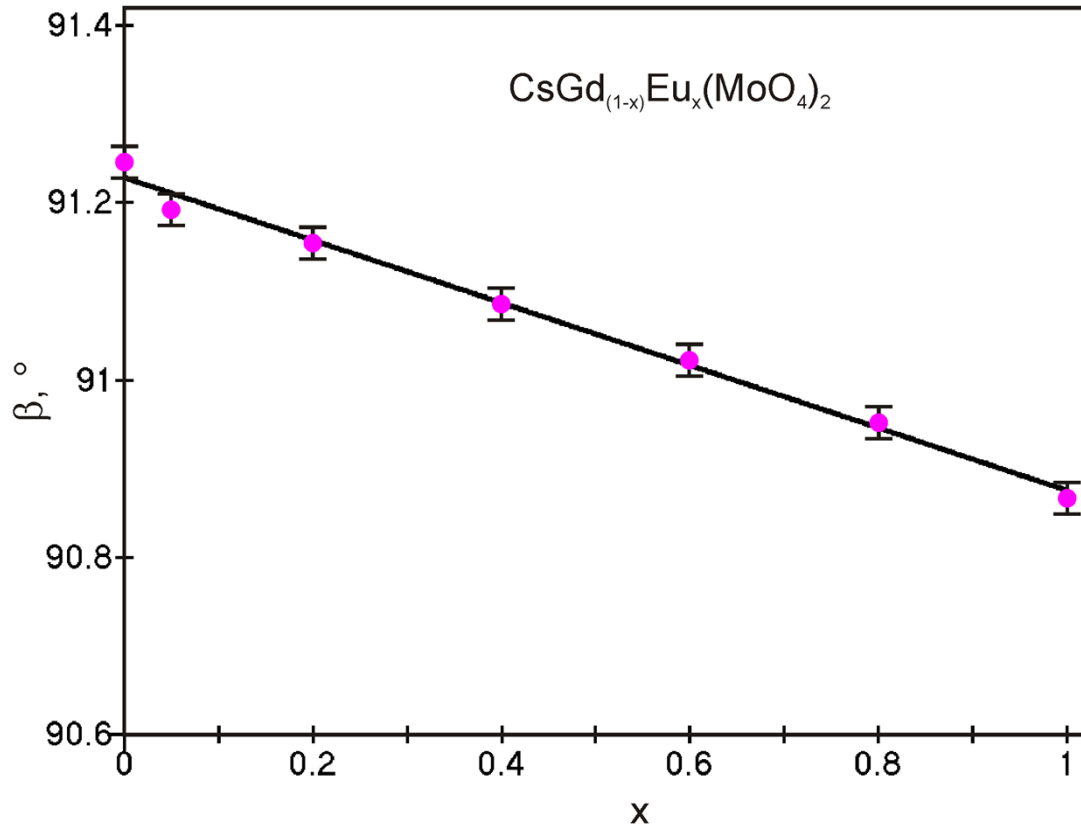

Fig. 4S. Dependence of monoclinic angle  $\beta$  on  $x$  in solid solutions  $\text{CsGd}_{1-x}\text{Eu}_x(\text{MoO}_4)_2$ .

**Table S1** The coordinates of atoms, isotropic thermal parameters ( $B_{\text{iso}}$ ) and atom position occupations in the  $\text{CsGd}_{(1-x)}\text{Eu}_x(\text{MoO}_4)_2$  structure at room temperature

| CsEu(MoO <sub>4</sub> ) <sub>2</sub> , x=1                                     |              |            |            |                  |            |
|--------------------------------------------------------------------------------|--------------|------------|------------|------------------|------------|
|                                                                                | <i>x</i>     | <i>y</i>   | <i>z</i>   | $B_{\text{iso}}$ | Occupation |
| Eu                                                                             | 0            | -0.044 (2) | 0.25       | 0.85 (9)         | 1          |
| Cs                                                                             | 0.5          | 0.000 (2)  | 0.25       | 1.85 (7)         | 1          |
| Mo                                                                             | 0.19657 (15) | 0.473 (2)  | 0.0038 (8) | 1.04 (8)         | 1          |
| O1                                                                             | 0.0690 (8)   | 0.743 (7)  | -0.003 (5) | 0.8 (2)          | 1          |
| O2                                                                             | 0.1932 (19)  | 0.229 (9)  | 0.890 (7)  | 0.8 (2)          | 1          |
| O3                                                                             | 0.3640 (9)   | 0.684 (6)  | 0.010 (5)  | 0.8 (2)          | 1          |
| O4                                                                             | 0.1868 (19)  | 0.213 (8)  | 0.204 (7)  | 0.8 (2)          | 1          |
| CsGd <sub>0.2</sub> Eu <sub>0.8</sub> (MoO <sub>4</sub> ) <sub>2</sub> , x=0.8 |              |            |            |                  |            |
|                                                                                | <i>x</i>     | <i>y</i>   | <i>z</i>   | $B_{\text{iso}}$ | Occupation |
| Gd                                                                             | 0            | -0.036 (3) | 0.25       | 0.98 (8)         | 0.2        |
| Eu                                                                             | 0            | -0.036 (3) | 0.25       | 0.98 (8)         | 0.8        |
| Cs                                                                             | 0.5          | -0.014 (3) | 0.25       | 2.30 (6)         | 1          |
| Mo                                                                             | 0.19683 (15) | 0.475 (2)  | 0.0054 (8) | 1.02 (7)         | 1          |
| O1                                                                             | 0.0653 (8)   | 0.736 (7)  | 0.001 (5)  | 1.5 (3)          | 1          |
| O2                                                                             | 0.198 (2)    | 0.244 (9)  | 0.884 (8)  | 1.5 (3)          | 1          |
| O3                                                                             | 0.3582 (8)   | 0.671 (6)  | 0.009 (6)  | 1.5 (3)          | 1          |
| O4                                                                             | 0.184 (2)    | 0.233 (7)  | 0.206 (8)  | 1.5 (3)          | 1          |

| CsGd <sub>0.4</sub> Eu <sub>0.6</sub> (MoO <sub>4</sub> ) <sub>2</sub> , x=0.6 |              |            |            |                         |            |
|--------------------------------------------------------------------------------|--------------|------------|------------|-------------------------|------------|
|                                                                                | <i>x</i>     | <i>y</i>   | <i>z</i>   | <i>B</i> <sub>iso</sub> | Occupation |
| Gd                                                                             | 0            | -0.040 (3) | 0.25       | 0.79 (9)                | 0.4        |
| Eu                                                                             | 0            | -0.040 (3) | 0.25       | 0.79 (9)                | 0.6        |
| Cs                                                                             | 0.5          | -0.004 (3) | 0.25       | 2.14 (7)                | 1          |
| Mo                                                                             | 0.19691 (17) | 0.472 (3)  | 0.0029 (9) | 0.48 (8)                | 1          |
| O1                                                                             | 0.0664 (9)   | 0.724 (9)  | 0.005 (7)  | 1.5 (3)                 | 1          |
| O2                                                                             | 0.193 (2)    | 0.224 (11) | 0.874 (10) | 1.5 (3)                 | 1          |
| O3                                                                             | 0.3536 (10)  | 0.674 (7)  | 0.012 (7)  | 1.5 (3)                 | 1          |
| O4                                                                             | 0.187 (3)    | 0.225 (9)  | 0.199 (10) | 1.5 (3)                 | 1          |
| CsGd <sub>0.6</sub> Eu <sub>0.4</sub> (MoO <sub>4</sub> ) <sub>2</sub> , x=0.4 |              |            |            |                         |            |
|                                                                                | <i>x</i>     | <i>y</i>   | <i>z</i>   | <i>B</i> <sub>iso</sub> | Occupation |
| Gd                                                                             | 0            | -0.043 (2) | 0.25       | 0.73 (10)               | 0.6        |
| Eu                                                                             | 0            | -0.043 (2) | 0.25       | 0.73 (10)               | 0.4        |
| Cs                                                                             | 0.5          | -0.004 (2) | 0.25       | 2.26 (8)                | 1          |
| Mo                                                                             | 0.19642 (17) | 0.483 (3)  | 0.0039 (8) | 0.66 (8)                | 1          |
| O1                                                                             | 0.0645 (9)   | 0.713 (8)  | 0.004 (6)  | 1.5 (3)                 | 1          |
| O2                                                                             | 0.190 (2)    | 0.216 (9)  | 0.878 (9)  | 1.5 (3)                 | 1          |
| O3                                                                             | 0.3537 (11)  | 0.688 (7)  | 0.011 (7)  | 1.5 (3)                 | 1          |
| O4                                                                             | 0.188 (2)    | 0.209 (8)  | 0.187 (9)  | 1.5 (3)                 | 1          |
| CsGd <sub>0.8</sub> Eu <sub>0.2</sub> (MoO <sub>4</sub> ) <sub>2</sub> , x=0.2 |              |            |            |                         |            |

|                                                                                   | $x$          | $y$        | $z$        | $B_{\text{iso}}$ | Occupation |
|-----------------------------------------------------------------------------------|--------------|------------|------------|------------------|------------|
| Gd                                                                                | 0            | -0.041 (2) | 0.25       | 0.77 (8)         | 0.8        |
| Eu                                                                                | 0            | -0.041 (2) | 0.25       | 0.77 (8)         | 0.2        |
| Cs                                                                                | 0.5          | -0.005 (2) | 0.25       | 2.14 (7)         | 1          |
| Mo                                                                                | 0.19658 (15) | 0.479 (2)  | 0.0046 (7) | 0.67 (7)         | 1          |
| O1                                                                                | 0.0651 (8)   | 0.710 (7)  | 0.009 (5)  | 1.5 (3)          | 1          |
| O2                                                                                | 0.192 (2)    | 0.231 (9)  | 0.880 (8)  | 1.5 (3)          | 1          |
| O3                                                                                | 0.3573 (9)   | 0.698 (6)  | 0.015 (6)  | 1.5 (3)          | 1          |
| O4                                                                                | 0.188 (2)    | 0.226 (8)  | 0.205 (8)  | 1.5 (3)          | 1          |
| CsGd <sub>0.95</sub> Eu <sub>0.05</sub> (MoO <sub>4</sub> ) <sub>2</sub> , x=0.05 |              |            |            |                  |            |
|                                                                                   | $x$          | $y$        | $z$        | $B_{\text{iso}}$ | Occupation |
| Gd                                                                                | 0            | -0.042 (2) | 0.25       | 0.95 (9)         | 0.95       |
| Eu                                                                                | 0            | -0.042 (2) | 0.25       | 0.95 (9)         | 0.05       |
| Cs                                                                                | 0.5          | 0.001 (2)  | 0.25       | 2.39 (9)         | 1          |
| Mo                                                                                | 0.19689 (17) | 0.480 (2)  | 0.0048 (7) | 0.89 (8)         | 1          |
| O1                                                                                | 0.0653 (9)   | 0.731 (7)  | 0.003 (5)  | 1.5 (3)          | 1          |
| O2                                                                                | 0.198 (2)    | 0.234 (8)  | 0.889 (7)  | 1.5 (3)          | 1          |
| O3                                                                                | 0.356 (1)    | 0.676 (6)  | 0.013 (5)  | 1.5 (3)          | 1          |
| O4                                                                                | 0.180 (2)    | 0.241 (7)  | 0.203 (6)  | 1.5 (3)          | 1          |
| CsGd(MoO <sub>4</sub> ) <sub>2</sub> , x=0                                        |              |            |            |                  |            |
|                                                                                   | $x$          | $y$        | $z$        | $B_{\text{iso}}$ | Occupation |



|    |              |            |            |           |   |
|----|--------------|------------|------------|-----------|---|
| Gd | 0            | -0.038 (3) | 0.25       | 0.82 (10) | 1 |
| Cs | 0.5          | -0.005 (3) | 0.25       | 2.19 (9)  | 1 |
| Mo | 0.19657 (19) | 0.480 (3)  | 0.0043 (9) | 0.66 (9)  | 1 |
| O1 | 0.0653 (9)   | 0.715 (9)  | 0.007 (6)  | 1.5 (3)   | 1 |
| O2 | 0.192 (3)    | 0.231 (10) | 0.897 (9)  | 1.5 (3)   | 1 |
| O3 | 0.3571 (11)  | 0.690 (7)  | 0.012 (7)  | 1.5 (3)   | 1 |
| O4 | 0.187 (3)    | 0.227 (9)  | 0.205 (9)  | 1.5 (3)   | 1 |

**Table S2** Selected bond lengths (Å) for CsGd<sub>x</sub>Eu<sub>(1-x)</sub>(MoO<sub>4</sub>)<sub>2</sub>

| CsEu(MoO <sub>4</sub> ) <sub>2</sub> , x=1                                     |          |                     |            |
|--------------------------------------------------------------------------------|----------|---------------------|------------|
| Eu—O1 <sup>i</sup>                                                             | 2.42 (4) | Cs—O3 <sup>v</sup>  | 2.97 (4)   |
| Eu—O1 <sup>ii</sup>                                                            | 2.59 (4) | Cs—O4               | 3.19 (2)   |
| Eu—O2 <sup>iii</sup>                                                           | 2.34 (4) | Mo—O1               | 1.83 (3)   |
| Eu—O4                                                                          | 2.24 (3) | Mo—O2 <sup>vi</sup> | 1.55 (5)   |
| Cs—O2 <sup>iv</sup>                                                            | 3.36 (3) | Mo—O3               | 1.921 (19) |
| Cs—O3 <sup>i</sup>                                                             | 2.82 (4) | Mo—O4               | 2.10 (5)   |
| CsGd <sub>0.2</sub> Eu <sub>0.8</sub> (MoO <sub>4</sub> ) <sub>2</sub> , x=0.8 |          |                     |            |
| Gd(Eu)—O1 <sup>i</sup>                                                         | 2.42 (4) | Cs—O3 <sup>v</sup>  | 3.06 (4)   |
| Gd(Eu)—O1 <sup>ii</sup>                                                        | 2.60 (4) | Cs—O4               | 3.27 (2)   |
| Gd(Eu)—O2 <sup>iii</sup>                                                       | 2.40 (4) | Mo—O1               | 1.83 (3)   |
| Gd(Eu)—O4                                                                      | 2.26 (3) | Mo—O2 <sup>vi</sup> | 1.54 (5)   |
| Cs—O2 <sup>iv</sup>                                                            | 3.31 (3) | Mo—O3               | 1.833 (19) |
| Cs—O3 <sup>i</sup>                                                             | 2.84 (4) | Mo—O4               | 2.04 (6)   |
| CsGd <sub>0.4</sub> Eu <sub>0.6</sub> (MoO <sub>4</sub> ) <sub>2</sub> , x=0.6 |          |                     |            |
| Gd(Eu)—O1 <sup>i</sup>                                                         | 2.40 (5) | Cs—O3 <sup>v</sup>  | 3.05 (5)   |
| Gd(Eu)—O1 <sup>ii</sup>                                                        | 2.68 (5) | Cs—O4               | 3.22 (3)   |
| Gd(Eu)—O2 <sup>iii</sup>                                                       | 2.28 (5) | Mo—O1               | 1.79 (3)   |
| Gd(Eu)—O4                                                                      | 2.28 (4) | Mo—O2 <sup>vi</sup> | 1.64 (7)   |
| Cs—O2 <sup>iv</sup>                                                            | 3.30 (4) | Mo—O3               | 1.81 (2)   |

|                                                                                |          |                     |            |
|--------------------------------------------------------------------------------|----------|---------------------|------------|
| Cs—O3 <sup>i</sup>                                                             | 2.87 (5) | Mo—O4               | 2.03 (7)   |
| CsGd <sub>0.6</sub> Eu <sub>0.4</sub> (MoO <sub>4</sub> ) <sub>2</sub> , x=0.4 |          |                     |            |
| Gd(Eu)—O1 <sup>i</sup>                                                         | 2.43 (4) | Cs—O3 <sup>v</sup>  | 3.01 (4)   |
| Gd(Eu)—O1 <sup>ii</sup>                                                        | 2.71 (4) | Cs—O4               | 3.19 (3)   |
| Gd(Eu)—O2 <sup>iii</sup>                                                       | 2.24 (4) | Mo—O1               | 1.72 (3)   |
| Gd(Eu)—O4                                                                      | 2.27 (3) | Mo—O2 <sup>vi</sup> | 1.70 (6)   |
| Cs—O2 <sup>iv</sup>                                                            | 3.33 (3) | Mo—O3               | 1.83 (2)   |
| Cs—O3 <sup>i</sup>                                                             | 2.83 (4) | Mo—O4               | 2.03 (6)   |
| CsGd <sub>0.8</sub> Eu <sub>0.2</sub> (MoO <sub>4</sub> ) <sub>2</sub> , x=0.2 |          |                     |            |
| Gd(Eu)—O1 <sup>i</sup>                                                         | 2.41 (4) | Cs—O3 <sup>v</sup>  | 2.99 (4)   |
| Gd(Eu)—O1 <sup>ii</sup>                                                        | 2.74 (4) | Cs—O4               | 3.21 (2)   |
| Gd(Eu)—O2 <sup>iii</sup>                                                       | 2.30 (4) | Mo—O1               | 1.72 (3)   |
| Gd(Eu)—O4                                                                      | 2.28 (3) | Mo—O2 <sup>vi</sup> | 1.61 (5)   |
| Cs—O2 <sup>iv</sup>                                                            | 3.34 (3) | Mo—O3               | 1.895 (19) |
| Cs—O3 <sup>i</sup>                                                             | 2.76 (4) | Mo—O4               | 2.07 (6)   |
| CsGd(MoO <sub>4</sub> ) <sub>2</sub> , x=0                                     |          |                     |            |
| Gd—O1 <sup>i</sup>                                                             | 2.41 (5) | Cs—O3 <sup>v</sup>  | 3.00 (4)   |
| Gd—O1 <sup>ii</sup>                                                            | 2.71 (5) | Cs—O4               | 3.22 (3)   |
| Gd—O2 <sup>iii</sup>                                                           | 2.37 (5) | Mo—O1               | 1.73 (3)   |
| Gd—O4                                                                          | 2.27 (4) | Mo—O2 <sup>vi</sup> | 1.53 (6)   |
| Cs—O2 <sup>iv</sup>                                                            | 3.39 (4) | Mo—O3               | 1.87 (2)   |

|                    |          |       |          |
|--------------------|----------|-------|----------|
| Cs—O3 <sup>i</sup> | 2.80 (4) | Mo—O4 | 2.07 (6) |
|--------------------|----------|-------|----------|

Symmetry codes: (i)  $x, y-1, z$ ; (ii)  $-x, -y+1, -z$ ; (iii)  $-x, -y, -z+1$ ; (iv)  $-x+1, -y, -z+1$ ; (v)  $-x+1, -y+1, -z$ ; (vi)  $x, y, z-1$
